Kinetic-Mechanistic Evidence for Which *E. coli* RNA Polymerase- $\lambda P_R$  Open Promoter  
Complex Initiates and for Stepwise Disruption of Contacts in Bubble Collapse

Dylan Plaskon<sup>a\*</sup>, Kate Henderson<sup>a\*</sup>, Lindsey Felth<sup>a</sup>, Cristen Molzahn<sup>a</sup>,  
Claire Evensen<sup>a</sup>, Sarah Dyke<sup>a</sup>, Irina Shkel<sup>a,b</sup>, M. Thomas Record, Jr.<sup>a,b</sup>

Departments of Biochemistry<sup>a</sup> and Chemistry<sup>b</sup>  
University of Wisconsin Madison  
Madison, Wisconsin 53706

\*Contributed equally to this research

## Abstract (250 words)

In transcription initiation, specific contacts between RNA polymerase (RNAP) and promoter DNA are disrupted as the RNA-DNA hybrid advances into the cleft, resulting in escape of RNAP. From the pattern of large and small rate constants for steps of initiation at  $\lambda P_R$  promoter at 19°C, we proposed that in-cleft interactions are disrupted in extending 3-mer to 5-mer RNA, -10 interactions are disrupted in extending 6-mer to 9-mer, and -35 interactions are disrupted in extending 10-mer to 11-mer, allowing RNAP to escape. Here we test this mechanism and determine enthalpic and entropic activation barriers of all steps from kinetic measurements at 25°C and 37°C. Initiation at 37°C differs significantly from expectations based on lower-temperature results. At low concentration of the second iNTP (UTP), synthesis of full-length RNA at 37°C is slower than at 25°C and no transient short RNA intermediates are observed, indicating a UTP-dependent bottleneck step early in the 37°C mechanism. Analysis reveals that the 37°C  $\lambda P_R$  OC ( $RP_O$ ) cannot initiate and must change conformation to a less-stable initiation complex (IC) capable of binding the iNTP. We find that IC is the primary  $\lambda P_R$  OC species below 25°C, and therefore conclude that IC must be the  $I_3$  intermediate in  $RP_O$  formation. Surprisingly, Arrhenius activation energy barriers to five steps where RNAP-promoter in-cleft and -10 contacts are disrupted are much smaller than for other steps, including a negative barrier for the last of these steps. We interpret these striking effects as enthalpically-favorable, entropically-unfavorable, stepwise bubble collapse accompanying disruption of RNAP contacts.

### Significance (123 words)

Transcription initiation is highly regulated. To understand regulation, mechanisms of initiation and escape of RNA polymerase (RNAP) from the promoter must be understood. RNAP forms a highly-stable open complex ( $RP_O$ ) with  $\lambda P_R$  promoter at 37°C. From experiments determining effects of temperature on rate constants for each step of RNA synthesis, we find that  $RP_O$  cannot bind the initiating nucleotides, that the  $I_3$  intermediate and not  $RP_O$  is the initiation complex, and that contacts of RNAP with single-stranded DNA of the discriminator and -10 region and with -35 duplex DNA are disrupted stepwise as the RNA-DNA hybrid moves into the cleft. Evidence is obtained for stepwise bubble collapse and base stacking accompanying disruption of interactions of the single-stranded discriminator and -10 regions with RNAP.

## Introduction

Transcription initiation, including open complex formation and subsequent steps of NTP binding and synthesis of a RNA-DNA hybrid, is a prime target for regulation. An understanding of the kinetics and mechanism of transcription initiation (1-9) is needed to complement structural characterization of RNAP-promoter initiation complexes (10-13), with applications to antibiotic development and synthetic promoter design (14). In the initial specific closed complex (RP<sub>C</sub>), the start site region of duplex promoter DNA is not contacted by RNAP (10, 15). Recent kinetic-mechanistic and structural research have increased our understanding of the mechanisms by which the start site region is opened by RNAP using binding free energy and the template strand is brought to the vicinity of the RNAP active site to form the initial (unstable) open complex (I<sub>2</sub>) (11, 15-22).

At numerous promoters, including  $\lambda$ P<sub>R</sub>, much more stable open complexes are formed from I<sub>2</sub> by conformational changes that appear to be directed by interactions of  $\sigma^{70}$  region 1.2 with the non-template (nt) discriminator strand in the cleft (23). At  $\lambda$ P<sub>R</sub>, these interactions directs downstream mobile elements (DME) to assemble and tighten on the downstream duplex after opening the initiation bubble and rotating the downstream duplex by about one turn (360°) to form I<sub>2</sub>. At 37 °C these DME interactions convert unstable I<sub>2</sub> to the very stable  $\lambda$ P<sub>R</sub> RP<sub>O</sub> complex via the I<sub>3</sub> intermediate (1, 15, 24-27), a process which is strongly favored by increasing temperature (13 °C - 42 °C). MnO<sub>4</sub><sup>-</sup> footprinting revealed that the same bubble region was open in  $\lambda$ P<sub>R</sub> I<sub>2</sub> as in the stable  $\lambda$ P<sub>R</sub> OC at 10 °C, and that the reactivity of the +1 thymine on the template strand was similar in these OC, indicating that the positioning of the +1 thymine might be the same (28). The question of which OC is/are capable of initiation upon NTP addition has not been addressed previously.

In the steps of productive initiation, translocation of the RNA-DNA hybrid into the cleft disrupts specific contacts of RNAP with in-cleft, -10, and -35 regions of the promoter, resulting in collapse of (and duplex formation by) the upstream portion of the initiation bubble (-1 to -11 for

$\lambda P_R$ ), escape of RNAP from the promoter, and dissociation of the  $\sigma^{70}$  subunit (2, 29, 30).

Escape of RNAP from the  $\lambda P_R$  occurs after synthesis of an 11-mer RNA (5, 31).

At the  $\lambda P_R$  promoter, stress buildup and disruption of RNAP-promoter contacts have been monitored by their effects on the composite second order rate constant  $k_i$  ( $k_{cat}/K_M$  analog) for the individual steps of NTP addition up to promoter escape ( $2 \leq i \leq 11$ ) at 19 °C. Values of  $k_i$  includes contributions from reversible translocation, reversible NTP binding and irreversible catalysis (32). Values of  $k_i$  for steps of initiation involving translocation divide into three groups. Values of  $k_i$  are much larger for synthesis of 3-mer, 6-mer, and 10-mer RNA than for the other six steps (32).

Elongation kinetic studies reveal that the translocation step before NTP binding is rapidly reversible and that the post-translocated state is intrinsically less stable than the pre-translocated state (33-35). The post-translocated state is stabilized by binding of the next NTP (32, 35). In initiation, effects of translocation stress greatly increase the bias toward the pretranslocated state (32). Large  $k_i$  values indicate elongation steps where translocation is less unfavorable because stress has not yet built up (2-mer  $\rightarrow$  3-mer) or where stress has been released by disruption of contacts in previous steps (5-mer  $\rightarrow$  6-mer; 9-mer  $\rightarrow$  10-mer). We proposed that moderate-strength in-cleft interactions are disrupted primarily in steps 4-5, strong -10 interactions are disrupted primarily in steps 7-9, and relatively weak -35 and upstream interactions are disrupted in step 11, resulting in escape of RNAP (32).

Here we report the kinetics of initial transcription at the  $\lambda P_R$  promoter at 25 °C and 37 °C. Rapid-quench mixing is used to determine overall rates of full-length RNA synthesis and rate constants for individual nucleotide addition steps at two nucleotide conditions (designated high UTP, low UTP) for comparison with the 19 °C results. These studies address the questions of which OC conformation is capable of binding nucleotides and which specific RNAP-promoter contacts are disrupted in the individual steps of hybrid-translocation, resulting in collapse of the initiation bubble and escape of RNAP from the promoter. In addition, they provide key

thermodynamic information about the I<sub>3</sub> OC and the steps by which the unstable I<sub>2</sub> OC converts to RP<sub>0</sub>.

## Results

### *Unexpected Differences Between $\lambda P_R$ Promoter Initiation Kinetics at 37 °C and 25 °C*

Time courses ( $\leq 0.5$  s to  $\geq 90$  s) of transcription initiation by *E. coli* RNA polymerase (RNAP) at the  $\lambda P_R$  promoter at 37 °C and 25 °C were obtained by rapid mixing at two different sets of NTP concentrations for comparison with previous results at 19 °C (32). The competitor heparin, added with the NTP mixture, ensures that FL RNA synthesis is single-round by preventing re-initiation by any dissociated RNAP. The panels of Fig. 1 show polyacrylamide gel electrophoresis (PAGE) separations of RNAs present in samples quenched at a series of time points during initiation and the transition to elongation. Amounts of each RNA length present at each time are detected by incorporation of <sup>32</sup>P-GTP or <sup>32</sup>P-UTP. Fig. 1 panels A-C are for a “high UTP” condition (final concentrations 200  $\mu$ M UTP and ATP, 10  $\mu$ M GTP, 17 nM <sup>32</sup>P-GTP), and panels D-F are for a “low UTP” condition (final concentrations 10  $\mu$ M UTP, 200  $\mu$ M ATP and GTP, 17 nM <sup>32</sup>P-UTP). Efficient incorporation of  $\alpha$ -<sup>32</sup>P label into the transcript is achieved by use of a low concentration (10  $\mu$ M) of the corresponding unlabeled NTP. The key first step of initiation (pppApU synthesis) is of course favored by the high UTP condition as compared to the low UTP condition.

For these experiments, the initial transcribed sequence of wild-type  $\lambda P_R$  was modified to pppA<sup>+1</sup>pUpGpUpApG<sup>+6</sup>pUpApApGpG<sup>+11</sup>pApGpGpUpU<sup>+16</sup>pC so the first C in the transcript occurs at position +17 and transcription pauses at a 16-mer when CTP is withheld. This pause occurs after escape of RNAP, which for this promoter is deduced to occur at the 10-mer to 11-mer step (5). All RNAs greater than 10-mer in length are considered part of the full-length (FL) RNA population. The transient accumulation of 12-mer and 13-mer may result from the reduction in rate constants for the subsequent steps caused by coupling of translocation to disruption of  $\sigma^{70}$  - core RNAP contacts. The next C in the transcript is near the end of the

fragment at +32, so read-through at +17 leads to a second pause at a 31-mer. Transcription occurs slowly near the end of a fragment, so this second pause is effectively a stop point.

Effects of temperature on three different aspects of initiation are shown in these gels for the two NTP conditions examined: 1) transient buildup and decay of short (3-mer to 10-mer) RNA intermediates in FL RNA synthesis by productive OC, observed at short times (<20 s) after NTP addition; 2) buildup of FL RNA (>10-mer) after an initial lag; and 3) synthesis at short times (<20 s) of an initial short RNA by non-productive OC, often but not always followed by slower release of that short RNA and re-initiation (abortive synthesis).

At an overview level, Fig. 1 shows that patterns of RNA synthesis by both productive and nonproductive complexes are similar at 25 °C and 19 °C, and that rates of steps of productive initiation and FL RNA synthesis as well as abortive initiation by nonproductive complexes all are larger at 25 °C. However, Fig. 1 reveals some large differences at 37 °C in rate and/or pattern of RNA synthesis by productive and nonproductive complexes from expectation based on the lower temperature results.

#### *Full-Length (FL) RNA Synthesis*

Fig. 1 reveals that, while the time required for synthesis of FL (>10-mer) RNA at the high UTP condition (panels D-F) decreases monotonically with increasing temperature, the time required for FL synthesis at 37 °C at the low UTP condition (panels A- C) is clearly greater than at 25 °C. Normalized amounts of FL RNA per OC are plotted vs time (log scale) in Fig. 2, which compares FL RNA synthesis at 25 °C and 37 °C with previous results at 19 °C for high UTP (Panel A) and low UTP (Panel B) conditions. Results are averages of 2-4 independent experiments including those in Fig. 1. Representative sets of unnormalized data from single experiments are plotted in Fig. S1. Plateau amounts of FL RNA per OC are  $0.5 \pm 0.15$  RNA/OC (e.g. Fig. S1), demonstrating that ~50% of the population of open complexes make a FL RNA, and are termed productive complexes. Each experiment is normalized relative to its plateau value before averaging.

At each condition, after an initial lag, FL RNA synthesis occurs over a ~20-fold time interval, from ~2 s to ~40 s at the low UTP condition at all temperatures and also at the high UTP condition at 19 °C, from ~1 s to ~20 s at the high UTP condition at 25 °C, and from ~0.4 s to ~8 s at the high UTP condition at 37 °C. For high UTP conditions (Fig. 2A), as the temperature is increased the length of the lag phase decreases and the rate of subsequent FL RNA synthesis increases. For low UTP (high GTP) conditions (Fig. 2B) the lag is longer and less temperature-dependent and the rate of FL synthesis is slower than at high UTP (Fig. 2A; low GTP), even though the RNA at the point of escape has more G bases (4) than U bases (3). Most notably, while FL synthesis is faster at 25 °C than at 19 °C at low UTP (Fig 2B) as well as at high UTP (Fig 2A), FL synthesis at 37 °C and low UTP is as slow or slower than at 19 °C.

As observed previously (5), the kinetics of FL synthesis after the initial lag are well-described as first-order (single exponential) approaches to the plateau value characterized by a first-order rate constant  $k_{FL}$ . At high UTP,  $k_{FL}$  increases monotonically with temperature, with a positive Arrhenius activation energy that decreases with increasing temperature (Fig. S2). At low UTP, all values of  $k_{FL}$  are smaller and the 25 °C value is larger than the 37 °C value, corresponding to a negative activation energy between 25 °C and 37 °C (Fig. S2) and indicating a change in the rate determining step(s) with increasing temperature.

#### *Transient Short RNA Intermediates in FL RNA Synthesis; Separation from Abortive RNA*

At 25 °C, prior to and during the appearance of FL RNA (< 20 s after NTP addition), transient buildups and decays in amount of various short on-pathway RNAs of increasing length (3-mer to 10-mer) are observed in the gels of Fig. 1, as previously reported at 19 °C (5). The time evolution of amounts of four different short RNAs (3-mer, 5-mer, 6-mer, 10-mer) in initiation at high and low UTP conditions at 37 °C and 25 °C are compared with previous results for 19 °C in Fig. 3. Results plotted are averages obtained from analysis of multiple gels like in Fig. 1 and are normalized per open complex before averaging.



Amounts of each RNA plotted vs. time in Fig. 3 include both transient RNA intermediates on the pathway to FL RNA synthesis by productive OC and short RNAs synthesized by nonproductive complexes (32). To emphasize the short time range where FL RNA is being synthesized by productively-initiating complexes, while also showing the longer time behavior, these plots use logarithmic time axes. Linear time scale plots of these data and data for other short RNAs (4-mer to 9-mer) observed at each temperature and NTP condition, which display more clearly the slow kinetics of abortive initiation by nonproductive complexes and the separation of intermediates in productive initiation from abortive products, are shown and discussed briefly in Supplemental as Figs. S3-S6 and accompanying text. Extrapolation of the amount of abortive RNA back to short times (SI Figs. S3-S6) provides a baseline to quantify the amount of each short-RNA transient as a function of time in FL RNA synthesis by productive complexes.

At 25°C, at both low UTP and high UTP, Fig. 3 shows that amounts of all four RNA species increase rapidly and then decrease in the first 10 s, consistent with previous observations at 19 °C and indicating significant transients on the pathway to productive synthesis (32). Each transient occurs earlier at 25 °C than at 19 °C at both NTP conditions, as expected since most reaction rates increase with increasing temperature. Also each transient occurs earlier at high UTP than at low UTP at both temperatures, expected because UTP is a reactant in the first step of initiation (pppApU synthesis).

At 37 °C, however, no significant transient population of any intermediate is observed in FL RNA synthesis at low UTP. At high UTP, 37 °C, transient populations of some longer RNA intermediates (5-mer, 6-mer, 9-mer, 10-mer) are detected at times similar to those observed at 25 °C and high UTP, but the amounts are small by comparison to what is observed at lower temperatures. These observations, and the slower synthesis of FL RNA at low UTP at 37 °C than at 25 °C, all indicate that the population of 37 °C LPR OC, unlike OC populations at lower temperatures, is unable to bind the initiating NTP and synthesize pppApU initiate without

undergoing a conformational change. This mechanistic step is introduced in the analysis of the initiation kinetics below.

The stability of the  $\lambda P_R$  OC is more than 30-fold greater at 37 °C than at 19 °C (22, 25). We previously proposed that the population distribution of  $\lambda P_R$  OC also changed with temperature, shifting from the very-stable 37 °C  $RP_O$  with strong downstream interactions between RNAP DME and duplex DNA extending to +20 to a mixed population of  $RP_O$  and the less stable intermediate OC designated  $I_3$  at lower temperature (25). If only  $I_3$  and not  $RP_O$  can bind the two initiating NTP, then the differences in rates of FL RNA synthesis between 37 °C and lower temperatures are readily explained. In Analysis and Discussion this proposal is incorporated into the initiation mechanism and used to analyze the kinetics of transient and FL RNA synthesis by productive complexes.

Figs. 1, 2 and S3-S6 also show the complex effects of temperature and NTP condition on initial and multi-round (abortive) synthesis of short RNAs by nonproductive complexes that stall before the escape point. These are discussed briefly in Supplemental.

## **Analysis and Discussion**

### *Evidence for an OC Conformational Change Prior to NTP Binding at 37 °C but not at 19 °C*

Previously, 19 °C  $\lambda P_R$  initiation kinetic data were fit to Mechanism 1 (Fig. 4) which begins with ordered, reversible binding of the substrates (ATP (+1), UTP (+2)) to the OC, followed by irreversible catalysis to synthesize the dinucleotide pppApU. In this fitting, individual values of the UTP binding constant ( $1/K_m$  analog) and the catalytic rate constant ( $k_{cat}$  analog) were obtained because the UTP binding constant in pppApU synthesis is relatively large ( $3 \times 10^4 M^{-1}$ ), leading to near-saturation of ATP-bound OC with UTP at 200  $\mu M$  UTP. No evidence was obtained for a conformational change in the OC prior to NTP binding (32).

Every subsequent step of initiation of RNA synthesis begins with reversible translocation. Translocation in elongation is intrinsically unfavorable (32, 35, 36), presumably because of disruption of one RNA-DNA hybrid base pair (a downstream DNA-DNA base pair is

disrupted but an upstream DNA-DNA base pair is formed). Translocation in initiation is more unfavorable (32). In addition to disruption of one DNA-DNA base pair, translocation stress accumulates and RNAP-promoter contacts are disrupted in many of these steps. Because translocation equilibrium constants for initiation steps are small, the overall equilibrium constant for the reversible translocation and NTP binding steps (analog of  $1/K_m$ ) cannot be separated from the rate constant of the irreversible catalytic step ( $k_{cat}$ ) for the NTP concentrations investigated (32). Hence each step of RNA-DNA hybrid extension up to the predicted point of escape is accurately quantified using a composite second order rate constant  $k_i$  (the analog of  $k_{cat}/K_m$ ; see (32)). This simplification of the enzyme mechanism is shown as Mechanism 1 in Fig. 4, together with the fit of the transient RNA peaks and FL RNA synthesis at 19 °C determined previously for low and high UTP conditions.

Also shown in Fig. 4 are the results of fitting the kinetic data at 25 °C and 37 °C to Mechanism 1 at low and high UTP conditions. At 25°C, rate constants  $k_i$  obtained from these fits accurately reproduce the transient appearance and disappearance of on-pathway short RNAs and the kinetics of synthesis of FL RNA. However, it is clear from Fig. 4 that Mechanism 1 is not sufficient to describe the kinetics of productive initiation at 37 °C. To obtain an accurate fit to the 37 °C kinetic data requires the addition of an unfavorable reversible step at the beginning of the mechanism, prior to initial ATP binding (Fig. 4, Mechanism 2, step 1a). This step is a conformational change in the OC, which we propose is the conversion of the very stable OC ( $RP_O$ ) to another OC conformation that we designate the initiation complex (IC), characterized by the equilibrium constant  $K_{1a}$  (for  $RP_O \rightarrow IC$ ). All other steps of Mechanism 2 are the same as Mechanism 1. Fig. 4 also shows that use of Mechanism 2 to fit 19 °C and 25 °C data sets does not affect the quality of these fits and yields estimates of  $K_{1a}$  at these temperatures.

These fits predict that equilibrium constant  $K_{1a}$  is extremely temperature dependent, greatly favoring  $RP_O$  at 37 °C ( $K_{1a} \approx 0.01$ ; 99% RP) but favoring IC at 19 °C ( $K_{1a} \approx 5.3$ ; more

than 80% IC). A near-equimolar ratio of RP<sub>O</sub> and IC is predicted at 25 °C ( $K_{1a} \approx 0.70$ ; ~40% IC; ~60% RP<sub>O</sub>). Good fits of 19 °C and 25 °C kinetic data to Mechanism 1 are obtained because a significant fraction of the OC population is initially in the IC conformation at these temperatures. The strong decrease in  $K_{1a}$  with increasing temperature indicates that the enthalpy change for the conversion of RP<sub>O</sub> to IC is large in magnitude and negative; van't Hoff analysis yields  $\Delta H_{1a}^{\circ} = -60 \pm 20$  kcal/mol. The standard free energy change  $\Delta G_{1a}^{\circ}$  for this conversion ranges from ~ 2.7 kcal at 37 °C to -1 kcal at 19 °C, and the corresponding entropy change  $\Delta S_{1a}^{\circ}$  is  $-200 \pm 60$  eu. Conversion of RP<sub>O</sub> to IC therefore shows near-complete enthalpy-entropy compensation, like many other protein processes.

*Only the I<sub>3</sub> Intermediate OC and not RP<sub>O</sub> Initiates Transcription from  $\lambda P_R$  Promoter Upon NTP Addition*

Evidence exists for two open intermediates ( $I_2$ ,  $I_3$ ) on the pathway to formation of the RP<sub>O</sub> complex at the  $\lambda P_R$  promoter. The thermodynamic, kinetic and footprinting information available for these intermediates support the proposal that IC is  $I_3$ .  $I_2$ , the OC formed in the DNA opening step, is unstable at all temperatures (25). It is unstable with respect to  $I_3$  and/or RP<sub>O</sub> at higher temperatures and unstable with respect to closed complexes at lower temperatures. Conversion of  $I_2$  to  $I_3$  involves folding of 100-150 amino acid residues of RNAP DME (25), and is thought to strengthen contacts between the proximal downstream duplex and the  $\beta$  lobe and the  $\beta'$  clamp (27). Conversion of  $I_3$  to RP<sub>O</sub> is thought to involve primarily an interaction of the downstream jaw and associated DME with the distal downstream duplex (+10 to +20), which serves to tighten the entire RNAP-promoter interface in the OC. The OC formed by the jaw deletion variant of RNAP and by downstream truncation variants of the promoter are thought to be models of  $I_3$ ; equilibrium constants for forming these variant OC are one to two orders of magnitude smaller than binding of WT RNAP to full-length promoter DNA at 37 °C. Hydroxyl radical footprinting of the open complex with the jaw deletion RNAP variant reveals

that the entire RNAP-promoter interface in the OC is less protected and hence “looser” and more hydrated than in the WT RNAP OC (27).

From this body of previous research, the stable OC population was proposed to be an equilibrium mixture of  $I_3$  and  $RP_O$ , with  $RP_O$  highly favored at 37 C and  $I_3$  increasing in significance at lower temperature (15, 27), but the details of this were not known. Here we find that the stable OC population is an equilibrium mixture of  $RP_O$  and the IC initiation complex, with  $RP_O$  favored at 37 C and IC favored below 25 °C, indicating that IC is  $I_3$ . In support of this, extrapolation of  $K_{1a}$  (Mechanism 2) to lower temperature assuming a temperature-independent enthalpy change for  $RP_O \rightarrow IC$  ( $\Delta H_{1a}^o \approx -60$  kcal/mol) predicts that the IC: $RP_O$  population distribution for  $\lambda P_R$  at 10 °C, before NTP addition, is ~99% IC and only 1%  $RP_O$ . At 10 °C, Gries *et. al.* (28) determined  $MnO_4^-$  footprints of both strands of the open region in the stable  $\lambda P_R$  OC, now identified as the IC initiation complex. In addition, salt-upshifts were used to rapidly destabilize the 10 °C  $\lambda P_R$  OC and obtain a burst of  $I_2$ , the least stable open intermediate, for  $MnO_4^-$  footprinting. Hence the 10 °C  $\lambda P_R$  OC population, identified in the current research as 99% IC, is more stable and hence more advanced than  $I_2$  at 10 °C and therefore must be  $I_3$ .

The overall enthalpy change  $\Delta H_{I_2 \rightarrow I_3, RP_O}^o$  for conversion of  $I_2$  to the  $I_3 - RP_O$  equilibrium mixture at temperatures from 7 °C to 37 °C can be estimated by comparison of activation energies for OC dissociation (37) and for the DNA closing step (25).  $\Delta H_{I_2 \rightarrow I_3, RP_O}^o$  decreases from ~40 kcal at 10 C to ~7 kcal at 37 C. Identifying IC as  $I_3$  provides the enthalpy change  $\Delta H_{I_3 \rightarrow RP_O}^o = 60 \pm 20$  kcal, with no detectable temperature dependence. Using  $\Delta H_{I_3 \rightarrow RP_O}^o$  to interpret  $\Delta H_{I_2 \rightarrow I_3, RP_O}^o$  yields values of  $\Delta H_{I_2 \rightarrow I_3}^o$  which are very strongly temperature dependent, decreasing from approximately 40 kcal near 10 °C to -50 kcal near 37 °C. Hence the heat capacity change  $\Delta C_{p, I_2 \rightarrow I_3}^o = -3.5$  kcal K<sup>-1</sup>. Interpreted in terms of coupled folding,  $\Delta C_{p, I_2 \rightarrow I_3}^o = -3.5$  kcal K<sup>-1</sup> corresponds to folding of 100-150 amino acid residues in the conversion of  $I_2$  to  $I_3$ . Over 100 conserved residues in this region of the C terminus of  $\beta'$  are predicted to be intrinsically

disordered in free RNAP by the computer algorithm PONDR (26). This prediction from  $\Delta C_{p,I2 \rightarrow I3}^o$  is consistent with the amount of folding predicted from the urea dependence of the dissociation rate constant  $k_d$  (25). The urea dependence of  $k_d$  was found to be the same at 10 °C and 37 °C, indicating that all the folding in these steps is in the conversion of  $I_2$  to  $I_3$ , consistent with the absence of a detectable heat capacity change for the conversion of  $I_3$  to  $RP_O$ .

*Large, Systematic Changes in Rate Constants, Arrhenius Activation Energies and Transition State Barrier Heights  $G_i^{o\ddagger}$ ,  $\Delta H_i^{o\ddagger}$ , and  $\Delta S_i^{o\ddagger}$  for Steps of Initiation*

Composite rate constants  $k_i$  for the translocation-dependent steps in initial transcription show the same pattern at 25 °C and 37 °C as previously observed at 19 °C, with three distinct regions of small  $k_i$  that are separated by single steps with larger  $k_i$  (Figure 5; Table S2). To transition from initiation to elongation, the specific contacts between RNAP and promoter DNA that are essential to form the CC ensemble and direct opening of the transcription bubble must be broken. Previously we interpreted the pattern of 19 °C rate constants  $k_i$  ( $k_{cat}/K_m$  analog containing the equilibrium constants for translocation and NTP binding and the catalytic step  $k_{cat}$ ) in terms of the serial disruption of these promoter contacts. In this interpretation, differences in  $k_i$  values arise from differences in the equilibrium constant for translocation at each nucleotide addition step,  $K_{i,trans}$ . The very similar patterns of low and high  $k_i$  values at all three temperatures investigated indicate that interactions of RNAP with discriminator, -10 and -35 regions of the promoter are broken in the same steps at all three temperatures.

Analysis of the temperature dependences of the  $k_i$  values yields Arrhenius activation energies ( $E_{A,i}$ , Fig. 5; Table S3) for the individual steps of initiation. Strikingly, values of  $E_{A,i}$  vary by more than 30 kcal (from +27 kcal to -4 kcal).  $E_{A,2}$  for incorporation of UTP into pppApU, not involving translocation stress, is ~12 kcal, similar to that reported previously for elongation by *E. coli* RNAP (10 – 13 kcal; (36)).  $E_{A,3}$  and  $E_{A,4}$  for synthesis of 3-mer and 4-mer RNAs are much larger (~26 kcal), while  $E_A$  values for the following six steps are smaller (~ 6 kcal for synthesis of

5-mer to 8-mer RNA,  $\sim -4$  kcal for 9-mer, and  $\sim 16$  kcal for 10-mer). From Figure 5,  $k_9$  decreases with increasing temperature, resulting in a negative  $E_{A,9}$ . Four of these six steps were previously proposed as steps in which in-cleft and -10 region contacts are disrupted.  $E_{A,11}$  is larger than the previous six  $E_A$  values, though not as large as  $E_{A,3}$  and  $E_{A,4}$ .

Significantly, steps with unusually small  $E_{A,i}$  values (Fig. 5) follow steps with small rate constants, in which RNAP-contacts with the discriminator and -10 region are disrupted, with an offset of one step. These observations can be explained as the result of stepwise base stacking (and/or base pairing) after stepwise disruption of RNAP contacts with the strands of the discriminator and -10 region in productively initiating complexes, as discussed below.

From rate constants  $k_i$  and activation energies  $E_{A,i}$ , the quasi-thermodynamic quantities  $\Delta G_i^{0\ddagger}$ ,  $\Delta H_i^{0\ddagger}$ , and  $\Delta S_i^{0\ddagger}$  for conversion of reactants to the catalytic transition state of each step can be estimated if the hypothetical maximum rate constant  $k_{\max}$  for this process (at  $\Delta G_i^{0\ddagger} = 0$ ) and its temperature dependence are known. As summarized in SI, for this overall 2<sup>nd</sup> order process we assume the same orientation-corrected diffusion-limited  $k_{\max} \approx 10^3 \mu\text{M}^{-1}\text{s}^{-1}$  for each step, and an activation energy  $E_{A,\text{diff}}$  for a diffusion-limited step of 5 kcal mol<sup>-1</sup> (38). Although the uncertainty in  $k_{\max}$  is probably one order of magnitude, this is of no consequence for the analysis in Tables S3-S4 and below as long as  $k_{\max}$  has the same value for each step.

For  $k_{\max} \approx 10^3 \mu\text{M}^{-1}\text{s}^{-1}$ ,  $\Delta G_2^{0\ddagger}$  for incorporation of the initiating UTP into pppApU is 4.3 kcal, and values of  $\Delta G_i^{0\ddagger}$  for subsequent steps of initiation ( $3 \leq i \leq 11$ ) are in the range 5.1 kcal to 6.6 kcal (Table S3). Values of  $\Delta H_i^{0\ddagger}$  and  $\Delta S_i^{0\ddagger}$  vary over much wider ranges. Like  $E_{A,i}$ , values of  $\Delta H_i^{0\ddagger}$  span a range of 30 kcal while values of  $\Delta S_i^{0\ddagger}$  span a range of more than 100 eu (Table S3). For incorporation of the initiating UTP into pppApU,  $\Delta H_2^{0\ddagger}$  and  $\Delta S_2^{0\ddagger}$  are modest (7 kcal, 9 eu). These values include contributions from the thermodynamics of UTP binding, including stacking of UTP on ATP, and from the intrinsic activation quantities for the catalytic step, but do not include any contributions from a translocation step.

Overall activation enthalpies and entropies of the next two steps (steps 3 and 4 of Mechanism 2) which begin with translocation, including opening one downstream base pair, are similar to one another and larger than those of pppApU synthesis by  $\sim 15$  kcal and  $\sim 45$  eu, respectively. We propose that these activation enthalpy and entropy differences arise from the translocation step. A substantial part of the positive  $\sim 15$  kcal enthalpy of translocation is presumably opening and unstacking one downstream bp, with an enthalpy cost of 5-15 kcal/mol in solution depending on the extent of unstacking the bases in the open strands (39). The large positive activation entropy ( $\sim 45$  eu), most of which also appears to originate from the translocation step, is not simply explained because the entropy increase from base pair disruption in the initiation complex is presumably not as large as that of base pair disruption in solution ( $\sim 25$  eu).

By comparison the next five steps, all of which also begin with translocation, exhibit significantly smaller positive activation enthalpies than steps 3 and 4. The first five of these steps also exhibit negative activation entropies (see Table S3). These include the steps previously identified as ones in which contacts of the discriminator and -10 strands with RNAP are disrupted, freeing the initiation bubble strands. Most notably, the activation enthalpy and entropy of step 9 (Mechanism 2;  $\sim -9$  kcal and  $-52$  eu) are 30 kcal and 100 eu less than those of steps 3 and 4. Activation enthalpies and entropies for steps 5 to 8 are  $\sim 20$  kcal and  $\sim 60 - 70$  eu less than those of steps 3 and 4, and for step 10 are  $\sim 10$  kcal and  $\sim 35$  eu less than those of steps 3 and 4. The activation enthalpy and entropy for step 10 are  $\sim 10$  kcal and  $\sim 35$  eu less than those of steps 3 and 4, reductions which appear significant but are not as large as for the preceding steps. Four of these steps (5, 7, 8, 9) also have small rate constants  $k_i$ . Unfavorable (negative)  $\Delta S_i^{\ddagger}$  activation barriers are responsible for these small rate constants, not large positive  $\Delta H_i^{\ddagger}$ .



Both the activation enthalpy and entropy of the last initiation step (step 11) are much larger than those of the preceding seven steps, though not quite as large as for steps 3 and 4. Contacts that are disrupted in this step are with the duplex (-35 and upstream) and not with single stranded DNA. Hence the unusual activation thermodynamics are confined to the steps that break RNAP contacts with the bubble strands.

*Stepwise Base Stacking of Discriminator and -10 Strands After RNAP Interactions are Disrupted*

A likely source of the unusual  $\Delta H_i^{0\ddagger}$  and  $\Delta S_i^{0\ddagger}$  values for forming 5-mer to 10-mer RNA is base stacking interactions occurring after interactions of the strands of the discriminator and the -10 region with RNAP are disrupted in a step-wise manner by translocation stress. Enthalpies and entropies of single-strand base stacking in solution are about -5 kcal mol<sup>-1</sup> and -15 eu (39); enthalpies and entropies of forming stacked base pairs in a duplex are about twice as large in magnitude. In Table S4, using these enthalpy changes, we interpret the reduced activation enthalpies of steps 5-10 as formation of 4 base stacking interactions in each of steps 5-8, 6 base stacking interactions in step 9 and 2 base stacking interactions in step 10. This totals 24 base stacking interactions, consistent with the stacking of all 11 bases of each bubble strand on their neighbors from the hybrid at +1 to the duplex at -12.

Single-stranded nucleic acid are highly stacked in solution at the temperatures investigated here. Calorimetric studies revealed that formation of the very stable wrapped SSB-ssDNA complex unstacks the bases of ssDNA, resulting in a very large positive (and temperature-dependent) binding enthalpy (40). Permanganate footprinting of the unstable RNAP- $\lambda P_R I_2$  open intermediate revealed that many thymines of the open strands of the initiation bubble are more stacked than in the more stable  $I_3$  open complex (28). Hence we expect that stepwise disruption of RNAP contacts with the discriminator and -10 strands in initiation will result in stacking of the bases in these regions.

Several aspects of the observed patterns in the rate constants and activation energies (Fig. 5; Table S3-4) are unusual. First, formation of stacked bases (as judged by small positive or negative activation enthalpies and entropies) lags the disruption of RNAP-promoter strand contacts with the discriminator and the -10 regions (as judged by small rate constants) by one step. Second, interpretation of these small activation enthalpies in terms of stacking reveals that all but the final stacking interactions within the bubble strands occur in groups of 4 or 6 bases, which is unexpected because base stacking in a single-stranded structure shows little if any cooperativity. Finally, no step has the large negative activation enthalpy and entropy that would be expected for duplex formation from these stacked strands, estimated to have a favorable enthalpy change of about  $-60 \text{ kcal mol}^{-1}$ . This may occur in step 9, though it would be expected in step 11 when upstream contacts are broken so there is no topological barrier to duplex formation.

The observation that no step has the large negative activation enthalpy and entropy that would be expected for duplex formation is consistent with the recent finding that reducing the stability of the bubble-region duplex by as much as 9 kcal by introducing mismatches at the promoter -6 and -10 positions has no effect on the rate of promoter escape (2). Step-by-step base stacking provides an explanation for this observation. Step-by-step stacking accompanying step-by-step disruption of RNAP-strand contacts with the discriminator and -10 regions can account for much of the favorable free energy change of duplex formation, distributing this effect over multiple steps of initiation.

## **Materials and Methods**

Details about reagents (buffers, enzymes, DNA), initiation kinetic assays (single-round in synthesis of full-length RNA), and analysis of amounts of transient short RNAs from productive complexes and of stalled and released short RNA from nonproductive complexes are described in reference (32) and in Supplemental.

## Acknowledgements

We gratefully acknowledge support of NIH GM R35-118100 for this research.

## References

1. Ruff EF, *et al.* (2015) *E. coli* polymerase determinants of open complex lifetime and structure. *Journal of Molecular Biology* 427:2435-2450.
2. Ko J & Heyduk T (2014) Kinetics of promoter escape by bacterial RNA polymerase: effects of promoter contacts and transcription bubble collapse. *Biochemistry Journal* 463:135-144.
3. Winkelman JT, *et al.* (2016) Multiplexed protein-DNA cross-linking: Scrunching in transcription start site selection. *Science* 351:1090-1093.
4. Duchi D, *et al.* (2016) RNA polymerase pausing during initial transcription. *Molecular Cell* 63:939-950.
5. Henderson KL, *et al.* (2017) Mechanism of transcription initiation and promoter escape by *E. coli* RNA polymerase. *Proceedings of the National Academy of Sciences* 114(15):E3032-E3040.
6. Lerner E, *et al.* (2016) Backtracked and paused transcription initiation intermediate of *Escherichia coli* RNA polymerase. *Proceedings of the National Academy of Sciences* 113:E6562-E6571.
7. Heyduk E & Heyduk T (2018) DNA template sequence control of bacterial RNA polymerase escape from the promoter. *Nucleic Acids Res* 46(9):4469-4486.
8. Dulin D, *et al.* (2018) Pausing controls branching between productive and non-productive pathways during initial transcription in bacteria. *Nature Communications* 9(1).
9. Koh HR, *et al.* (2018) Correlating Transcription Initiation and Conformational Changes by a Single-Subunit RNA Polymerase with Near Base-Pair Resolution. *Molecular Cell* 70(4):695-706.e695.
10. Murakami KS, S M, & Darst SA (2002) Structural Basis of Transcription Initiation: RNA Polymerase Holoenzyme at 4 Å Resolution. *Science* 296(5571):1280-1284.
11. Chen J, *et al.* (2020) Stepwise Promoter Melting by Bacterial RNA Polymerase. *Molecular Cell* 78(2):275-288.e276.
12. Zuo Y & Steitz TA (2015) Crystal structures of the *E. coli* transcription initiation complexes with a complete bubble. *Molecular Cell* 58:534-540.
13. Li L, Molodtsov V, Lin W, Ebright RH, & Zhang Y (2020) RNA extension drives a stepwise displacement of an initiation-factor structural module in initial transcription. *Proceedings of the National Academy of Sciences*:201920747.
14. Han L, *et al.* (2019) Development of a novel strategy for robust synthetic bacterial promoters based on a stepwise evolution targeting the spacer region of the core promoter in *Bacillus subtilis*. *Microbial Cell Factories* 18(1).
15. Ruff EF, Record MT, Jr. , & Artsimovitch I (2015) Initial events in bacterial transcription initiation. *Biomolecules* 5:1035-1062.

16. Sreenivasan R, *et al.* (2020) Fluorescence-Detected Conformational Changes in Duplex DNA in Open Complex Formation by *E. coli* RNA Polymerase: Upstream Wrapping and Downstream Bending Precede Clamp Opening and Insertion of the Downstream Duplex. (Cold Spring Harbor Laboratory).
17. Glyde R, *et al.* (2018) Structures of Bacterial RNA Polymerase Complexes Reveal the Mechanism of DNA Loading and Transcription Initiation. *Molecular cell* 70(6):1111-1120.e1113.
18. Hubin EA, *et al.* (2017) Structure and function of the mycobacterial transcription initiation complex with the essential regulator RbpA. *Elife* 6.
19. Feklistov A, *et al.* (2017) RNA polymerase motions during promoter melting. *Science* 356(6340):863-866.
20. Feklistov A & Darst SA (2011) Structural basis for promoter -10 element recognition by the bacterial RNA polymerase  $\sigma$  subunit. *Cell* 147(6):1257-1269.
21. Li X-Y & McClure WR (1998) Characterization of the closed complex intermediate formed during transcription initiation by *Escherichia coli* RNA polymerase. *Journal of Biological Chemistry* 273:23549-23557.
22. Saecker RM, *et al.* (2002) Kinetic studies and structural models of the association of *E. coli* sigma 70 RNA polymerase with the LPR promoter: large scale conformational changes in forming the kinetically significant intermediates. *Journal of Molecular Biology* 319:649-671.
23. Haugen SP, Ross W, Manrique M, & Gourse RL (2008) Fine structure of the promoter-sigma region 1.2 interaction. *Proceedings of the National Academy of Sciences* 105(9):3292-3297.
24. Kontur WS, Capp MW, Gries TJ, Saecker RM, & Record MTJ (2010) Probing DNA binding, DNA opening and assembly of a downstream clamp/jaw in *E. coli* RNA polymerase- $\lambda$ P<sub>R</sub> promoter complexes using salt and the physiological anion glutamate. *Biochemistry* 49(20).
25. Kontur WS, Saecker RM, Capp MW, & Record MTJ (2008) Late steps in the formation of *E. coli* RNA polymerase- $\lambda$ P<sub>R</sub> promoter open complexes: characterization of conformational changes by rapid [perturbant] upshift experiments. *Journal of Molecular Biology* 376:1034-1047.
26. Kontur WS, Saecker RM, Davis CA, Capp MW, & Record MT (2006) Solute Probes of Conformational Changes in Open Complex (RP<sub>o</sub>) Formation by *Escherichia coli* RNA Polymerase at the  $\lambda$ P<sub>R</sub> Promoter: Evidence for Unmasking of the Active Site in the Isomerization Step and for Large-Scale Coupled Folding in the Subsequent Conversion to RP<sub>o</sub>†. 45(7):2161-2177.
27. Drennan A, *et al.* (2012) Key roles of the downstream mobile jaw of *Escherichia coli* RNA polymerase in transcription initiation. *Biochemistry* 51:9447-9459.
28. Gries TJ, Kontur WS, Capp MW, Saecker RM, & Record MTJ (2010) One-step DNA melting in the RNA polymerase cleft opens the initiation bubble to form an unstable open complex. *Proceedings of the National Academy of Sciences* 107(23):10418-10423.
29. Revyakin A, Liu C, Ebright RH, & Strick TR (2006) Abortive initiation and productive initiation by RNA polymerase involve DNA scrunching. *Science* 314:1139-1143.
30. Revyakin A, Ebright RH, & Strick TR (2004) Promoter unwinding and promoter clearance by RNA polymerase: Detection by single-molecule DNA nanomanipulation. *Proceedings of the National Academy of Sciences* 101(14):4776-4780.

31. Stackhouse TM, Telesnitsky AP, & Mearns C, F. (1989) Release of the  $\sigma$  subunit from *Escherichia coli* RNA polymerase transcription complexes is dependent on the promoter sequence. *Biochemistry* 28:7781-7788.
32. Henderson KL, *et al.* (2019) RNA Polymerase: Step-by-Step Kinetics and Mechanism of Transcription Initiation. *Biochemistry* 58:2339-2352.
33. Guajardo R & Sousa R (1997) A model for the mechanism of polymerase translocation. *265(1):8-19.*
34. Bai L, Fulbright RM, & Wang MD (2007) Mechanochemical Kinetics of Transcription Elongation. *Physical Review Letters* 98(6).
35. Dangkulwanich M, *et al.* (2013) Complete dissection of transcription elongation reveals slow translocation of RNA polymerase II in a linear ratchet mechanism. *eLife* 2.
36. Mejia YX, Mao H, Forde NR, & Bustamante C (2008) Thermal Probing of E. coli RNA Polymerase Off-Pathway Mechanisms. *Journal of Molecular Biology* 382(3):628-637.
37. Roe J-H, Burgess RR, & Record Jr. MT (1985) Temperature dependence of the rate constants of the *Escherichia coli* RNA polymerase-Lambda PR promoter interaction. Assignment of the kinetic steps corresponding to protein conformational change and DNA opening. *Journal of Molecular Biology* 184(3):441-453.
38. Berg OG & Von Hippel PH (1985) Diffusion-Controlled Macromolecular Interactions. *Annual Review of Biophysics and Biophysical Chemistry* 14(1):131-158.
39. Holbrook JA, Capp MW, Saecker RM, & Record MT (1999) Enthalpy and Heat Capacity Changes for Formation of an Oligomeric DNA Duplex: Interpretation in Terms of Coupled Processes of Formation and Association of Single-Stranded Helices †. *38(26):8409-8422.*
40. Kozlov AG & Lohman TM (1999) Adenine base unstacking dominates the observed enthalpy and heat capacity changes for the *Escherichia coli* SSB tetramer binding to single-stranded oligoadenylates. *Biochemistry* 38:7388-7397.

## Figure Legends

**Figure 1: High-Resolution Time Courses of Transcription Initiation from  $\lambda P_R$  Promoter as a Function of Temperature.** Time-dependence of amounts of individual short and long RNA products of transcription initiation at the  $\lambda P_R$  promoter at 37 °C (**Panels A, D**) and 25 °C (**Panels B, E**), compared with 19 °C (**Panels C, F**; from ref (32)). Polyacrylamide gel separations are shown for the indicated times (0.1s to 150s) after adding NTPs and heparin to premixed RNAP and  $\lambda P_R$  promoter DNA. In all cases CTP is omitted to stop transcription from this modified  $\lambda P_R$  ITR at a 16-mer. **Panels A-C:** 200  $\mu$ M ATP and UTP, with 10  $\mu$ M GTP. RNA is labelled by addition of  $\sim 17$ nM  $\alpha$ - $^{32}$ P-GTP. **Panels D-F:** 200  $\mu$ M ATP and GTP, with 10  $\mu$ M UTP. The RNA is labelled by addition of  $\sim 17$ nM  $\alpha$ - $^{32}$ P-UTP. Slow formation of longer transcripts is likely the result of misincorporation (32).

**Figure 2: Kinetics of FL RNA Synthesis in Single-Round Initiation as a Function of Temperature.** Average total amount of FL (length >10 bp) RNA synthesized as a function of time at 19 °C (red), 25 °C (green), and 37 °C (black) from 2-4 experiments like those in Figure 1 at 10  $\mu$ M GTP (**Panel A**) and 10  $\mu$ M UTP (**Panel B**). Amount of FL RNA is normalized to the amount of FL produced by 150 s for each condition. Error bars represent one standard deviation.

**Figure 3: Time Courses of Short RNA Populations in Initiation as a Function of Temperature.** **Panels A** (10  $\mu$ M GTP) and **B** (10  $\mu$ M UTP) compare time courses (log scale) of synthesis of transient RNAs by productively-initiating complexes and of non-productive complexes at 19 °C, 25 °C, and 37 °C. Amounts of short RNA present are normalized per open complex (OC) and plotted vs time. Each point is an average of 2-4 experiments.

#### Figure 4: Comparison of Fits of Initiation Kinetic Data to Two Mechanisms

**LEFT:** Comparison of two mechanisms used to fit the  $\lambda P_R$  transcription initiation data. In

**Mechanism 1**, the first nucleotides (A, U) bind to the preformed active site without any conformational changes in the OC. This mechanism provides an excellent fit to 19 °C initiation kinetic data (32). **Mechanism 2:** To fit  $\lambda P_R$  initiation data at 37 °C, an initial, reversible, highly temperature dependent OC rearrangement (step 1a) must be added to **Mechanism 1** in which the stable  $\lambda P_R$  OC ( $RP_O$ ) is converted to a less stable but initiation competent OC form (IC, red). Formation of IC from  $RP_O$  at 37 °C is followed by reversible ATP binding at the transcription start site (step 1b), reversible UTP binding at position +2 (step 2a) and irreversible catalysis to form the initiating dinucleotide (step 2b). Subsequent steps of both mechanisms are the same, each including reversible translocation, reversible NTP binding, and irreversible catalysis. They are described at the NTP concentrations investigated here by a composite second order rate constant  $k_i$  ( $k_{cat}/K_m$  analog; (32)). **RIGHT:** Simulations of time evolution of the population of transient intermediates and full-length RNA synthesis by productive complexes, compared with experimental data. Panels show results for 37 °C (top), 25 °C (middle), and 19 °C (bottom) and two nucleotide conditions (high UTP (top), low UTP (bottom)). Fits to Mechanism 1 are shown in the left column and clearly do not describe the experimental data at 37 °C. Fits to Mechanism 2 are much more accurate at 37 °C, and achieve nearly identical quality of fit at 19 °C and 25 °C, providing values of the equilibrium constant for the conformational change  $RP_O \rightarrow IC$  at each temperature.

### **Figure 5: Rate Constants and Activation Energies on the Pathway to Promoter Escape**

The composite rate constant ( $k_i$ , in  $\mu\text{M}^{-1} \text{s}^{-1}$ ) including reversible translocation (steps 3-11), reversible NTP binding (steps 2-11), and irreversible catalysis (steps 2-11) for each RNA extension step up to the predicted point of escape are plotted vs the extension step for 19 °C (red), 25 °C (green), and 37 °C (black). The pattern of large  $k_i$  (steps 3, 6, 10) and small  $k_i$  (steps 4-5, 7-9, and 11) are consistent for each temperature. Arrhenius activation energies ( $E_{A, i}$ ; orange, right scale) of the steps of initiation, determined from the temperature dependence of  $k_i$  (Fig. S7), are also shown.



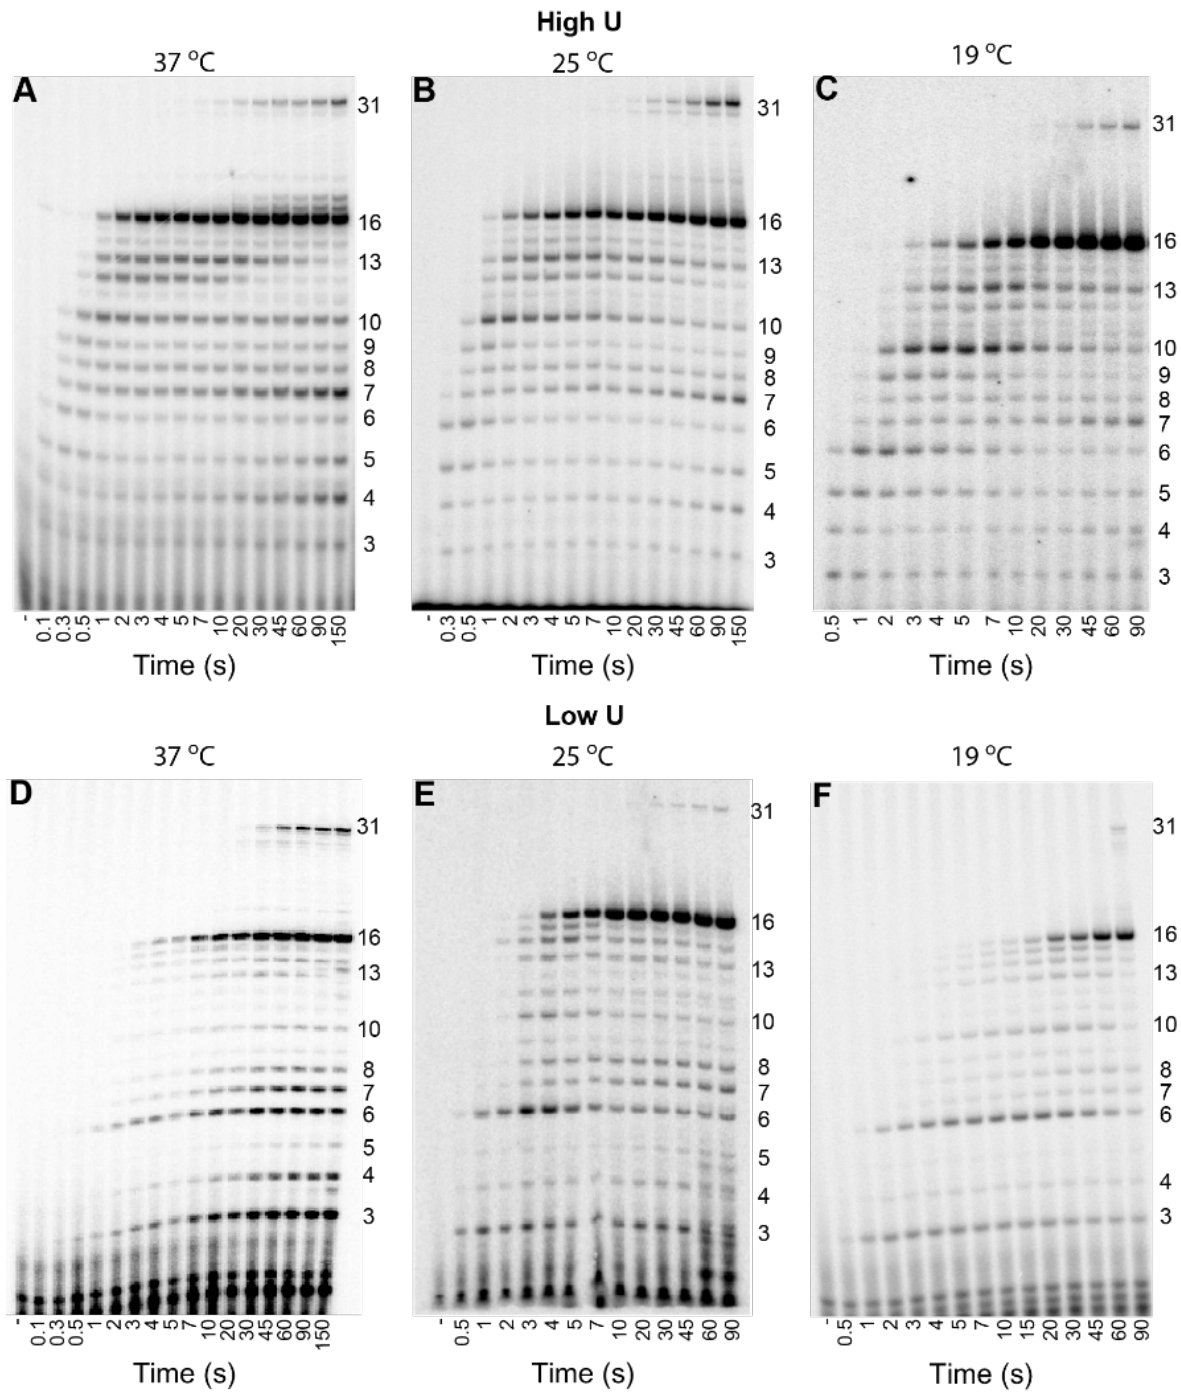

**Figure 1**

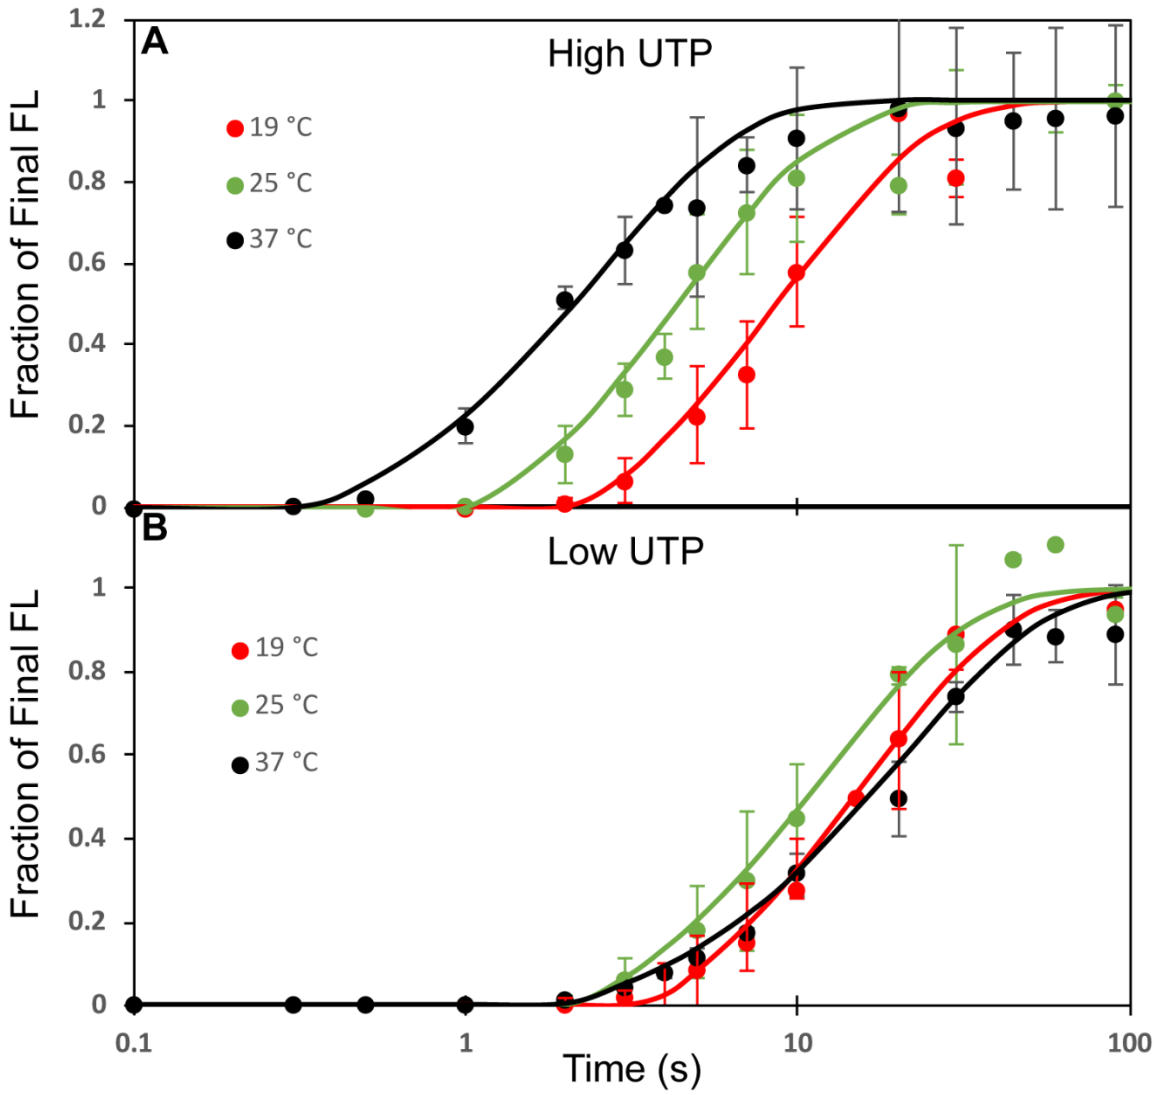

Figure 2

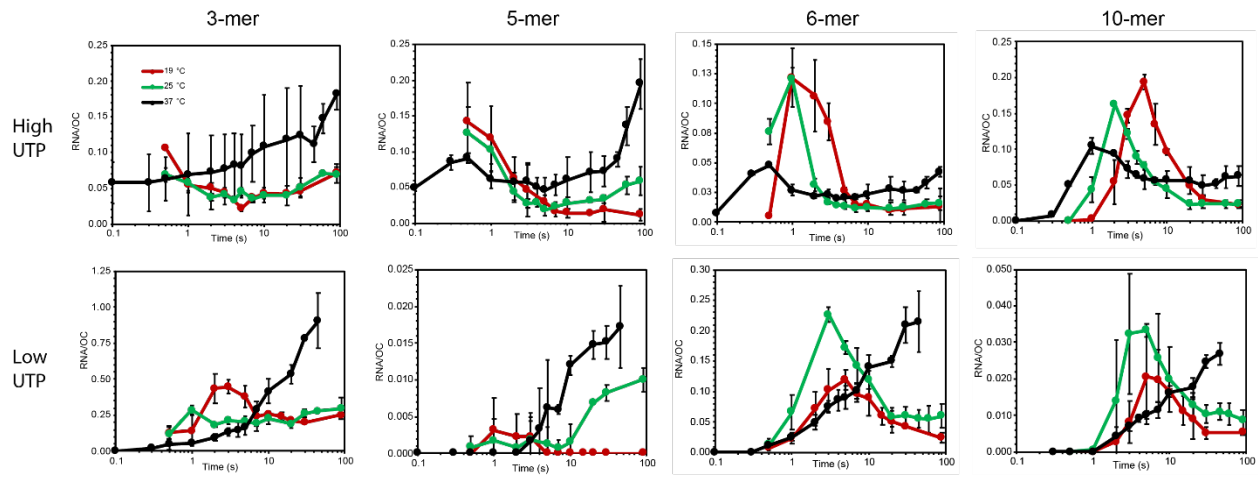

**Figure 3**

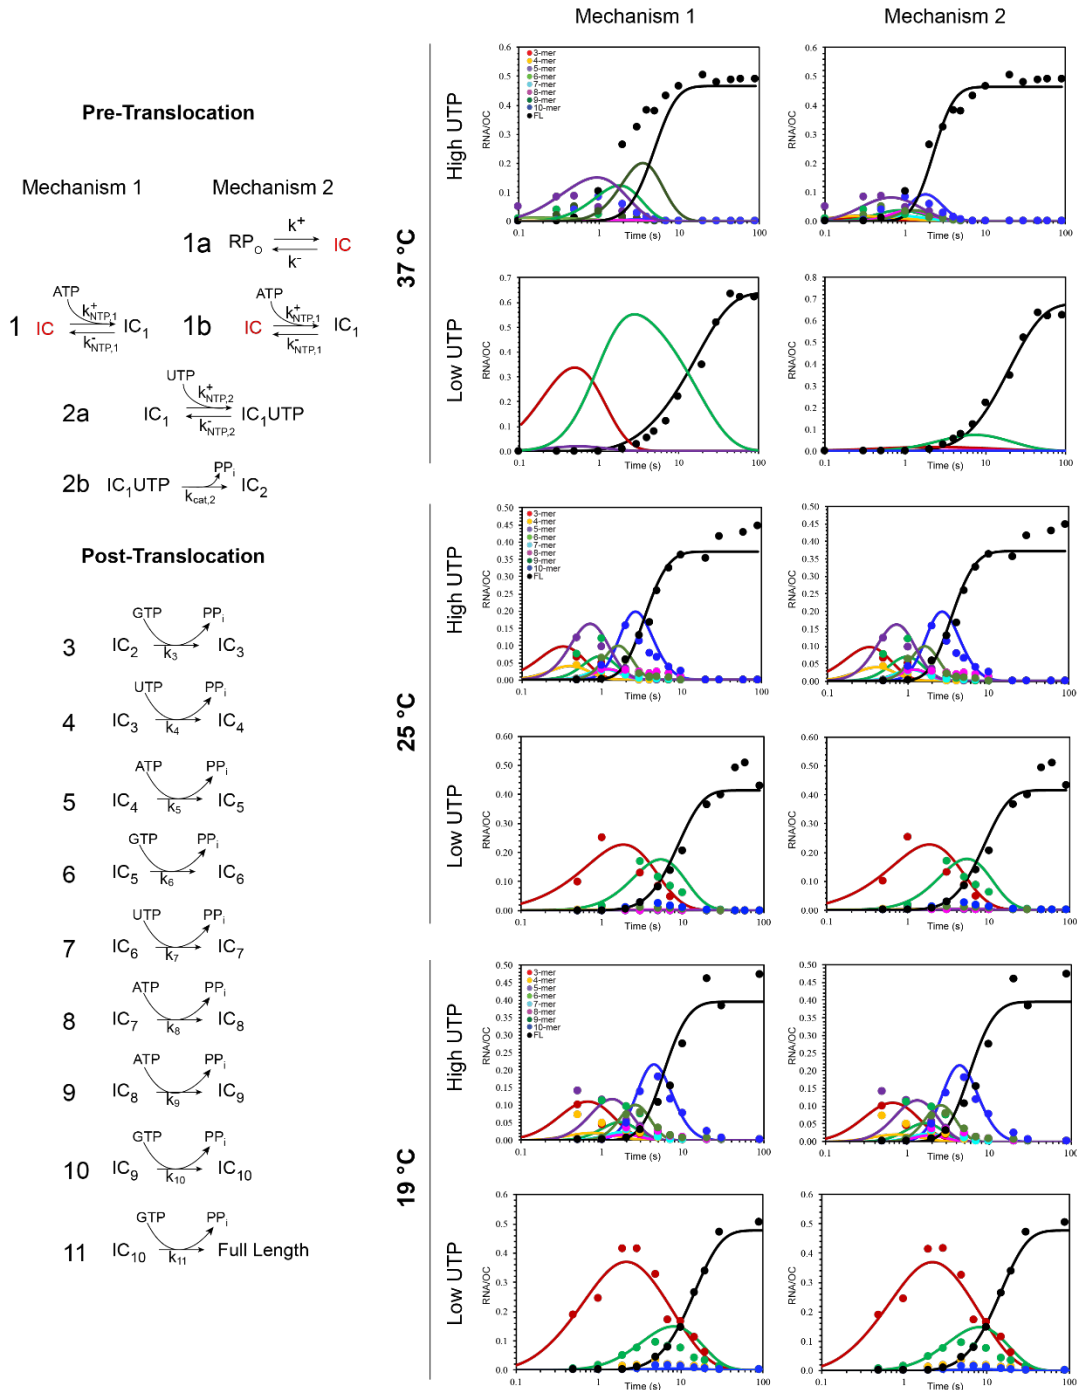

**Figure 4**

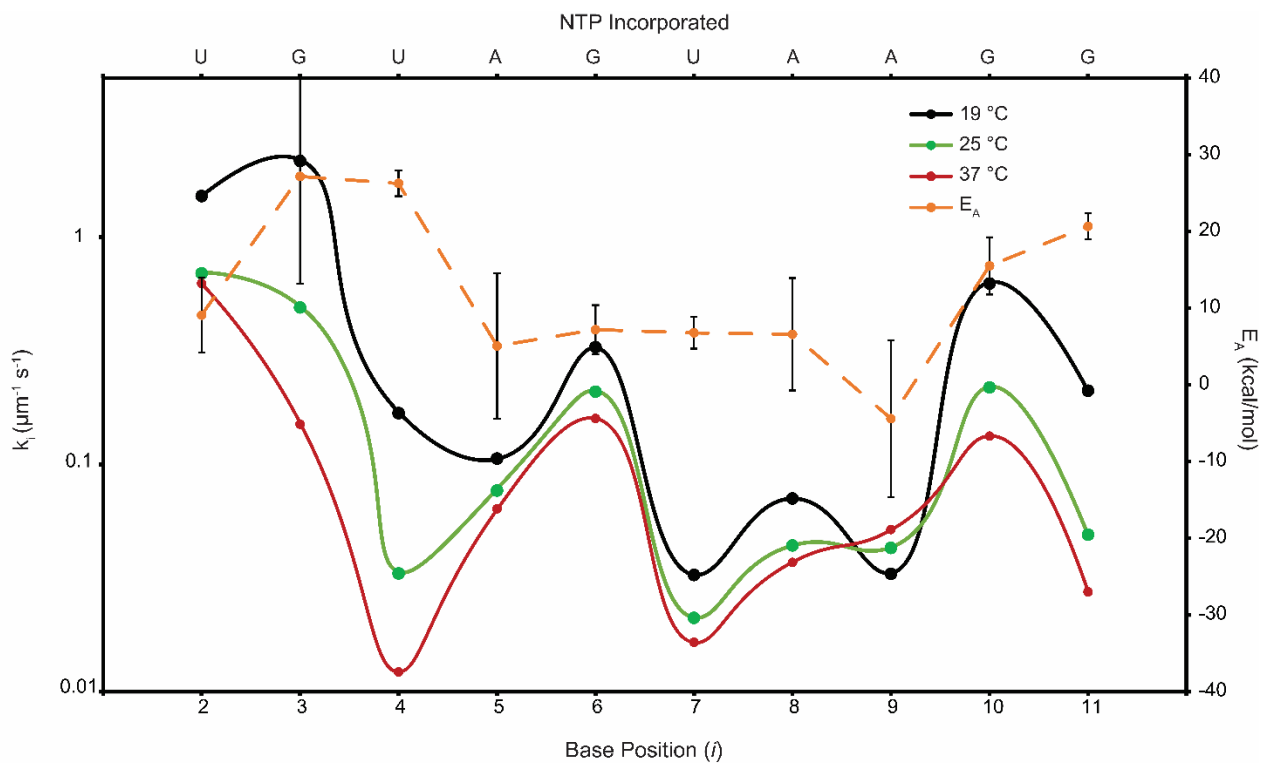

Figure 5
